# Supplementary material for: Inference of an Integrative, Executable Network for Rheumatoid Arthritis Combining Data-Driven Machine Learning Approaches and a State-of-the-Art Mechanistic Disease Map
Source: MDPI journal article supplement (doi:10.3390/jpm11080785), 2021-08-12
Supplement: s1 [file jpm-1315161-supplementary.pdf › jpm-1315161-supplementary.pdf]

# Inference of an integrative, executable network for Rheumatoid Arthritis combining data-driven machine learning approaches and a state-of-the-art mechanistic disease map

Quentin Miagoux<sup>1</sup>, Vidisha Singh<sup>1</sup>, Dereck de Mezquita<sup>1</sup>, Valerie Chaudru<sup>1</sup>, Mohamed Elati<sup>2</sup>, Elisabeth Petit-Teixeira<sup>1</sup>, Anna Niarakis<sup>1,3</sup>

1 Université Paris-Saclay, Univ Evry, Laboratoire Européen de Recherche pour la Polyarthrite rhumatoïde - Genhotel, 91057, Evry, France

2 CANTHER, University of Lille, CNRS UMR 1277, Inserm U9020, 59045 Lille, France

3 Lifeware Group, Inria Saclay-île de France, Palaiseau 91120, France

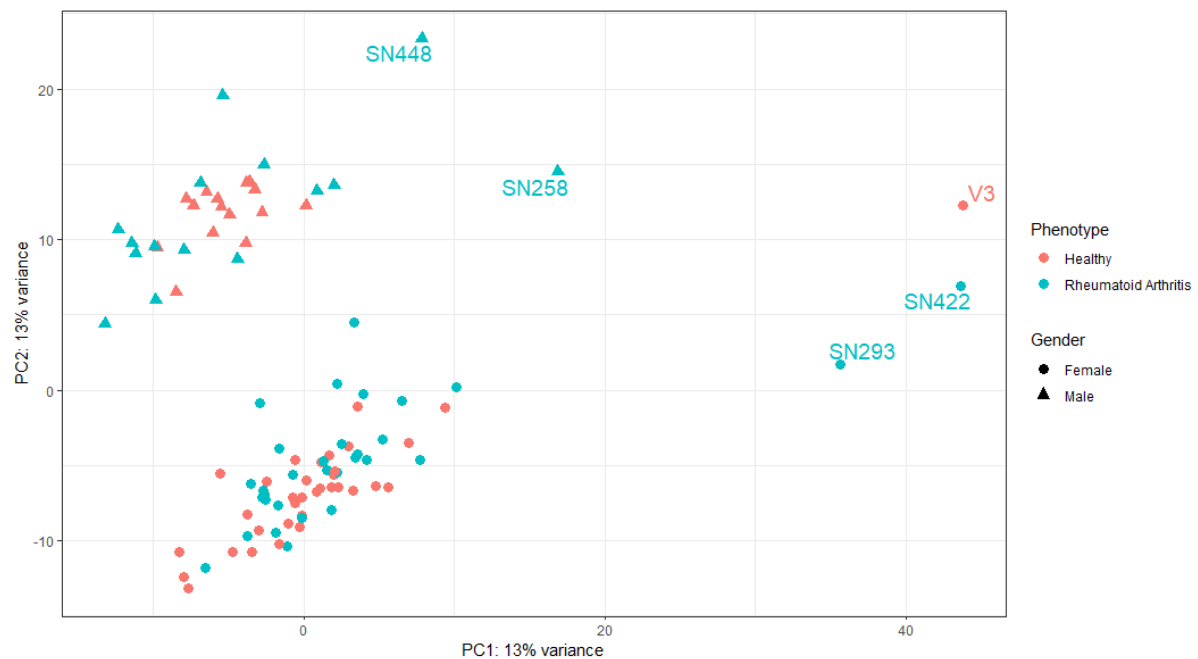

**Figure S1.** Principal component analysis (PCA) in samples of human blood cells from RA patients and healthy controls. The PCA shows 95 samples from the GSE117769 dataset (46 RA samples and 49 controls). In addition, a variance stabilising transformation was carried on the matrix expression data.

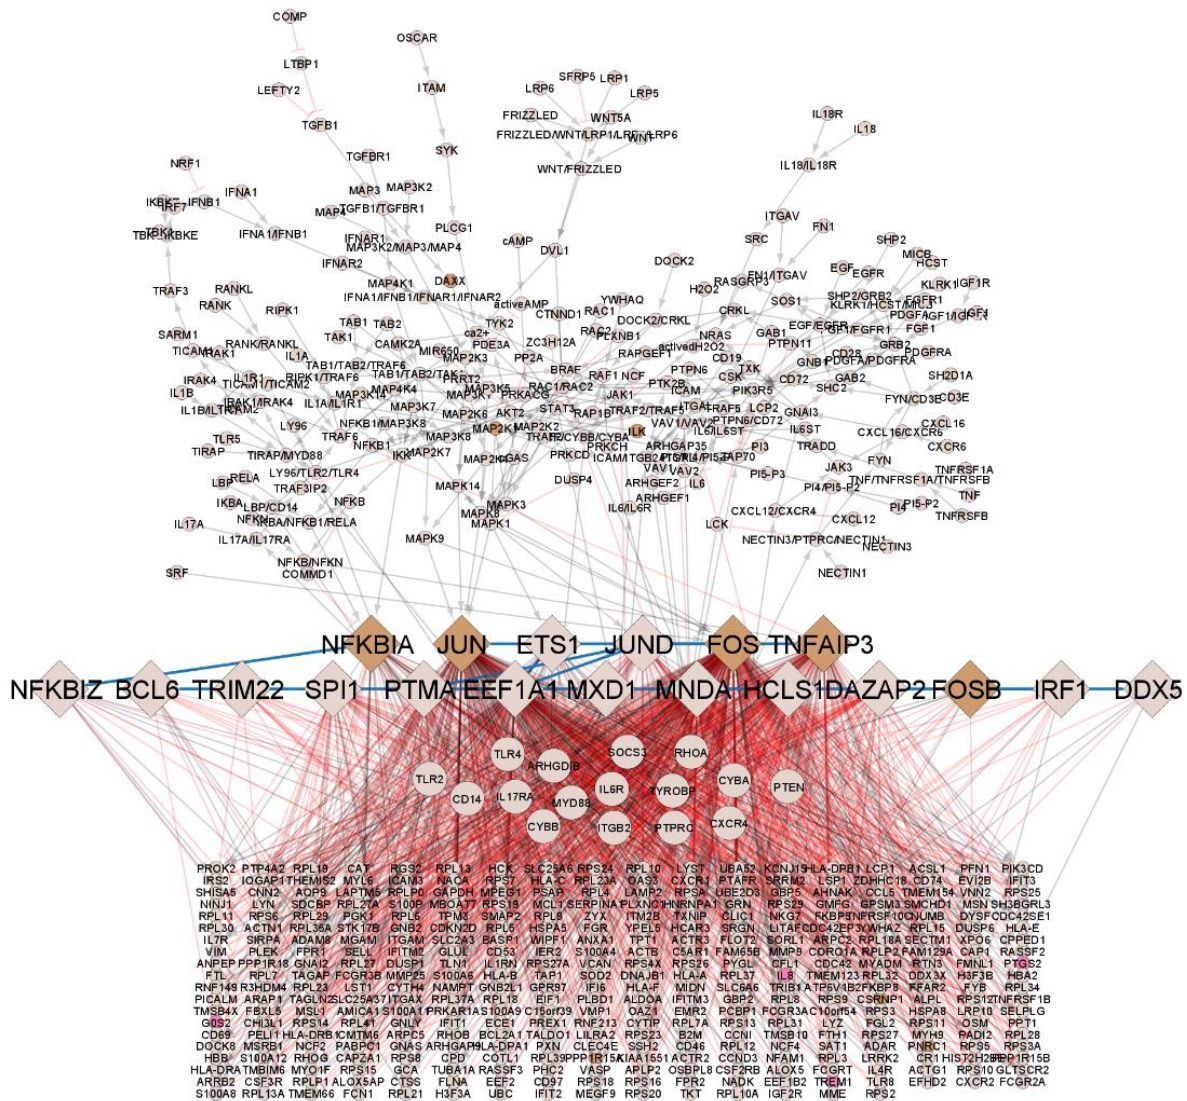

**Figure S2.** Global RA network and DEG from responders/non-responders to anti-TNF treatment (37 and 41 RA patients treated with Adalimumab and Etanercept, respectively). Overlapping DEG from Adalimumab treatment and Etanercept treatment data are shown in brown (11) and pink (4), respectively, while non-overlapping genes/proteins are shown in grey (599). Transcription factors are depicted in diamond shapes, while upstream regulators and target genes are depicted using round shapes.



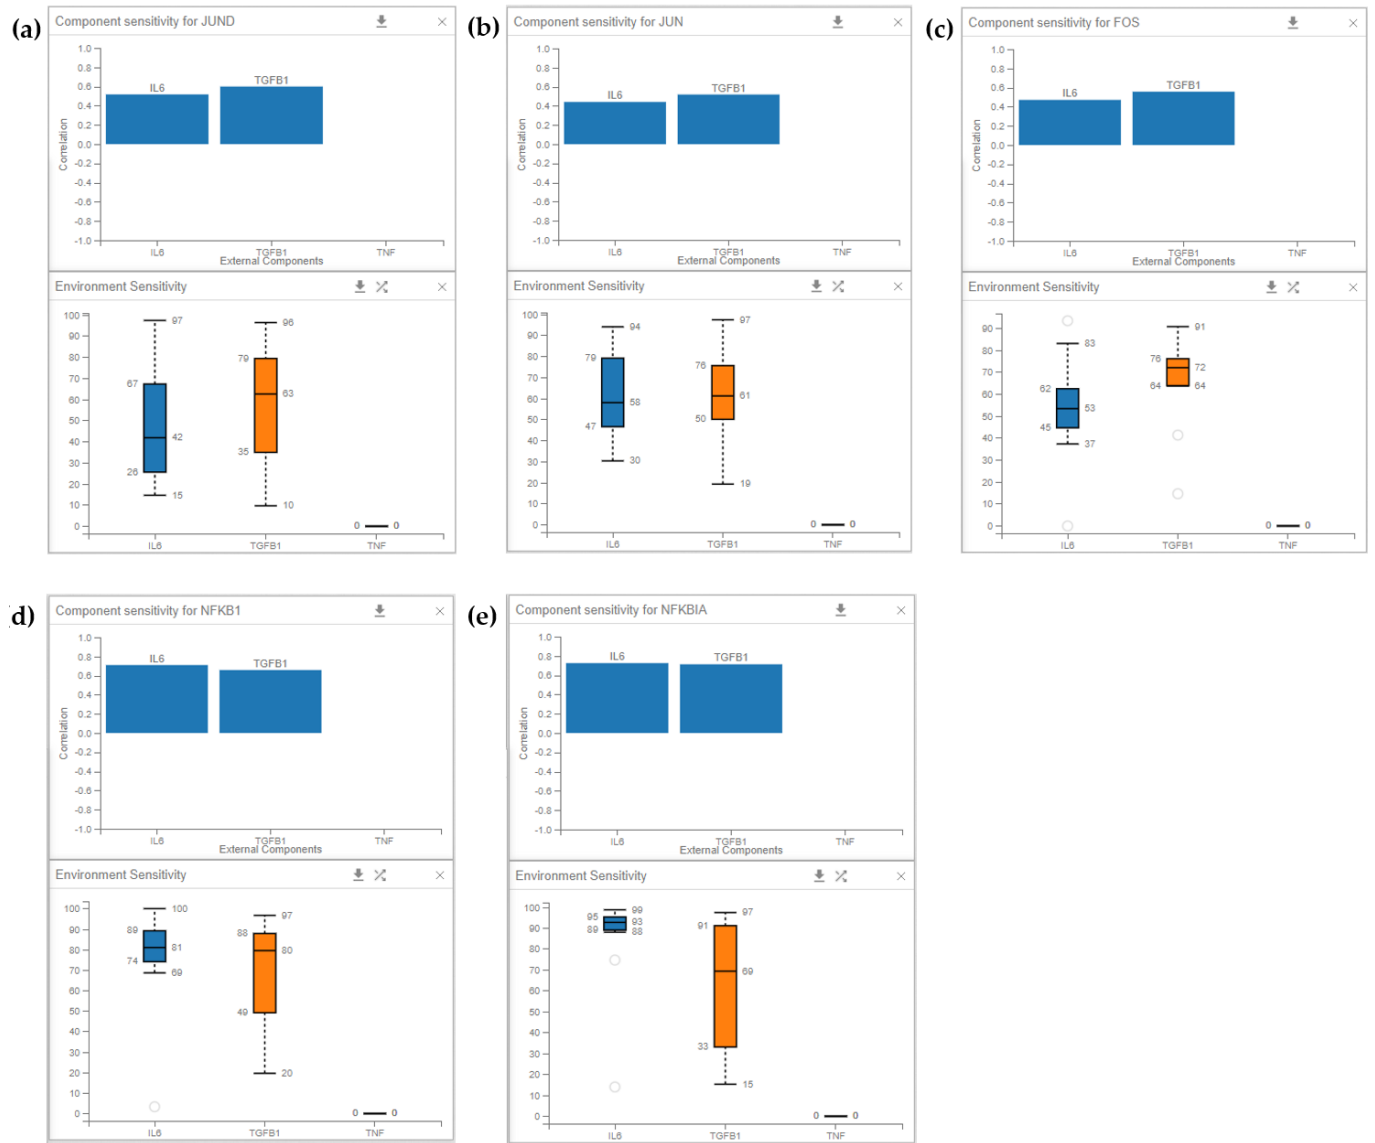

**Figure S4.** Environment sensitivity analysis. Transcription factors (TFs) could be upregulated in the absence of TNF activity for a combination of activity ranges of the other two inputs (IL6 and TGFB1). The upper part of each subfigure shows the impact of the external components on the activity state of the selected TFs, and the lower part of the image shows the range of activity percentage of the external components to achieve the optimisation of the activity state of the selected TFs. Sensitivity analysis for (a) JUND; (b) JUN; (c) FOS; (d) NFKB1; (e) NFKBIA; boxplots of IL6 in blue, TGFB1 in orange and TNF as black line as it is set to off.



**Table S1.** Transcription factors identified from CoRegNet and their involvement in RA based on literature evidence.

| No | Transcription factors | Role in RA                                                                                                                                                                                           | References                                                           |
|----|-----------------------|------------------------------------------------------------------------------------------------------------------------------------------------------------------------------------------------------|----------------------------------------------------------------------|
| 1  | <b>TNFAIP3</b>        | NF-κB target gene, also involved in negative-feedback mechanism to block NF-κB activation through its ubiquitin-editing function in response to various inflammatory signaling, including TNF, IL-1β | PMID: 20822710<br>PMID: 22402800<br>PMID: 20852893<br>PMID: 26405544 |
| 2  | <b>IRF1</b>           | IRF1 is critical for the TNF-driven interferon response in rheumatoid fibroblast-like synoviocytes                                                                                                   | PMID: 31285419<br>PMID: 21834067<br>PMID: 32765497                   |
| 3  | <b>ETS1</b>           | Factor involved in the cytokine-mediated inflammatory and destructive cascade which is a characteristic of RA                                                                                        | PMID: 23101665<br>PMID: 11229456<br>PMID: 11976735                   |
| 4  | <b>FOS</b>            | Subunit of AP1 transcription factor which is involved in the transcriptional regulation of many pro inflammatory genes in RA                                                                         | PMID: 19395871<br>PMID: 8660103<br>PMID: 9153554                     |
| 5  | <b>NFKBIA</b>         | Involved in different pathways and cellular processes such as TNFα signalling via NFκB                                                                                                               | PMID: 30468518<br>PMID: 18454843                                     |
| 6  | <b>JUND</b>           | Subunit of AP1 transcription factor which is involved in the transcriptional regulation of many pro inflammatory genes                                                                               | PMID: 9764613<br>PMID: 17515956                                      |

|           |               |                                                                                                                              |                                                    |
|-----------|---------------|------------------------------------------------------------------------------------------------------------------------------|----------------------------------------------------|
| <b>7</b>  | <b>HCLS1</b>  | Dysregulated in RA synovial tissue                                                                                           | PMID: 12905466<br>PMID: 19563633                   |
| <b>8</b>  | <b>SPI1</b>   | Essential for the expression of gliostatin/thymidine phosphorylase in RA which has angiogenic and arthritogenic activities   | PMID: 22534375<br>PMID: 28192374                   |
| <b>9</b>  | <b>MXD1</b>   | Expressed in RA peripheral blood cells, RA synovium                                                                          | PMID: 22753658<br>PMID: 10568429                   |
| <b>10</b> | <b>JUN</b>    | Subunit of AP1 transcription factor which is involved in the transcriptional regulation of many pro inflammatory genes in RA | PMID: 18454843                                     |
| <b>11</b> | <b>NFKBIZ</b> | Involved in TNF and IL-17 mediated signaling                                                                                 | PMID: 32079724                                     |
| <b>12</b> | <b>TRIM22</b> | Expressed in RA peripheral blood                                                                                             | PMID: 24756903                                     |
| <b>13</b> | <b>FOSB</b>   | Subunit of AP1 transcription factor which is involved in the transcriptional regulation of many pro inflammatory genes in RA | PMID: 29326694                                     |
| <b>14</b> | <b>DDX5</b>   | DDX5 is required for the transcription of key Th17 genes involved in Th17-mediated autoimmune inflammation in RA             | PMID: 29254845                                     |
| <b>15</b> | <b>BCL6</b>   | Interleukin-29 regulates T follicular helper cells by repressing BCL6 in RA                                                  | PMID: 16508929<br>PMID: 28150777<br>PMID: 32468318 |

|           |               |                                                                                                               |                                  |
|-----------|---------------|---------------------------------------------------------------------------------------------------------------|----------------------------------|
| <b>16</b> | <b>MNDA</b>   | Citrullinated protein identified in RA synovial fluid; Interferon induced nuclear and cytoplasmic protein     | PMID: 23044660<br>PMID: 15158620 |
| <b>17</b> | <b>EEF1A1</b> | Expressed in RA peripheral blood                                                                              | PMID: 21444302                   |
| <b>18</b> | <b>PTMA</b>   | Regulated by c-Myc, an oncoprotein overexpressed in synovium of RA, and is associated with cell proliferation | PMID: 17372028 (mice)            |
| <b>19</b> | <b>DAZAP2</b> | Expressed in RA peripheral blood mononuclear cells (PBMCs)                                                    | PMID:26352601                    |

## List of abbreviations

**AF:** Activity Flow  
**BCL6:** BCL6 Transcription Repressor  
**CaSQ:** CellDesigner as SBML-Qual  
**ChIP:** Chromatin Immunoprecipitation  
**DAZAP2:** DAZ Associated Protein 2  
**DAXX:** Death Domain Associated Protein  
**DEA:** Differential Expression Analysis  
**DMARDs:** Disease-Modifying Anti-Rheumatic Drugs  
**ETS1:** ETS Proto-Oncogene 1, Transcription Factor  
**EEF1A1:** Eukaryotic Translation Elongation Factor 1 Alpha 1  
**EI:** Evidence Index  
**FDR:** False Discovery Rate  
**FOS:** Fos Proto-Oncogene, AP-1 Transcription Factor Subunit  
**FOSB:** FosB Proto-Oncogene, AP-1 Transcription Factor Subunit  
**HCLS1:** Hematopoietic Cell-specific Lyn Substrate 1  
**IRF1:** Interferon Regulatory Factor 1  
**ILK:** Integrin Linked Kinase  
**IL6:** Interleukin 6  
**JUN:** Jun proto-oncogene, AP-1 transcription factor subunit  
**JUND:** JunD Proto-Oncogene, AP-1 Transcription Factor Subunit  
**KO:** Knock Out  
**MXD1:** MAX Dimerization Protein 1  
**MAPK1:** Mitogen-Activated Protein Kinase 1  
**MAPK14:** Mitogen-Activated Protein Kinase 14  
**MAP2K1:** Mitogen-Activated Protein Kinase Kinase 1  
**mAbs:** Monoclonal Antibodies  
**MNDA:** Myeloid Cell Nuclear Differentiation Antigen  
**MTX:** Methotrexate  
**NFKBIA:** NFKB Inhibitor Alpha  
**NFKB1:** Nuclear Factor Kappa B Subunit 1  
**PCA:** Principal Component Analysis  
**PTMA:** Prothymosin Alpha  
**RA:** Rheumatoid Arthritis  
**SIF:** Simple Interaction Format  
**TCZ:** Tocilizumab  
**TNFAIP3:** TNF Alpha Induced Protein 3  
**TF:** Transcription Factor  
**TGFB1:** Transforming Growth Factor Beta 1  
**TRIMM22:** Tripartite Motif Containing 22  
**TNF:** Tumor Necrosis Factor  
**VDA:** Variant Disease Association
